# Supplementary material for: Primary posterior laser capsulotomy (PPCL) after cataract surgery: 2-year results
Source: Research Square preprint supplement (doi:10.21203/rs.3.rs-4074558/v1), 2024-03-21
Supplement: Supplementary file 1 [file 10dcac011168608fc328854e.xlsx]

## Sheet: Tabelle1
Total Volume (mm³)
Control Group	Preoperative	2 years Postoperative	p value ( Pre-op vs 2 y Post-op)
Mean	8.57562	8.65375	0.012
SD	0.507961	0.580526
Min	7.33	7.27
Max	9.34	9.63
PPLC Group
Mean	8.59313	8.615	0.044
SD	0.573092	0.611269
Min	7.19	7.25
Max	9.62	9.82
p value (Control vs PPLC Group)	0.897	0.616
Center Volume (mm³)
Control Group	Preoperative	2 years Postoperative	p value ( Pre-op vs 2 y Post-op)
Mean	0.2225	0.228125	0.02
SD	0.0182003	0.0224217
Min	0.19	0.19
Max	0.25	0.27
PPLC Group
Mean	0.223125	0.226875	0.132
SD	0.0199119	0.022836
Min	0.18	0.18
Max	0.25	0.27
p value (Control vs PPLC Group)	0.87	0.93
Center Thickness (μm)
Control Group	Preoperative	2 years Postoperative	p value ( Pre-op vs 2 y Post-op)
Mean	241.688	244.75	0.288
SD	28.5651	33.5941
Min	198	182
Max	311	310
PPLC Group
Mean	241.812	243.5	0.698
SD	26.6111	32.0117
Min	187	188
Max	301	320
p value (Control vs PPLC Group)	0.87	0.93
