# Supplementary material for: Primary posterior laser capsulotomy (PPCL) after cataract surgery: 2-year results
Source: Research Square preprint supplement (doi:10.21203/rs.3.rs-4074558/v1), 2024-03-21
Supplement: Supplementary file 2 [file f3ebdbe1cf56c8d6e50c637a.xlsx]

## Sheet: Tabelle1
PCO Score
Control Group	Area 1	Area 2	Area 3	Area 4	Total
Mean	0.149405	0.0505238	0.00321429	0	0.26031
SD	0.128406	0.112325	0.0115893	0	0.306486
Min	0	0	0	0	0
Max	0.404333	0.365667	0.045	0	1.03767
PPLC Group
Mean	0.01525	0.0112708	0	0	0.0378958
SD	0.0280977	0.0350627	0	0	0.0841672
Min	0	0	0	0	0
Max	0.104667	0.142333	0	0	0.339667
p value	<0,01	0.448	0.759	1	0.06
